# Supplementary material for: An exclusive human milk diet for very low birth weight newborns—A cost-effectiveness and EVPI study for Germany
Source: PubMed Central journal article supplement (PMC6936873; doi:10.1371/journal.pone.0226496), 2019-12-30
Supplement: pone.0226496.s001.pdf [file pone.0226496.s001.pdf]

# Appendix for “The cost-effectiveness of an exclusive human milk diet for very low birth weight new-borns in Germany”

## Part 1: Medical input parameters of the model.

| Name                                     | Mean                                           | SD    | Low    | High   | Probabilistic value        | Source | Study period | Country | Comment                                                                                  |
|------------------------------------------|------------------------------------------------|-------|--------|--------|----------------------------|--------|--------------|---------|------------------------------------------------------------------------------------------|
| <b>Cohort size</b>                       | 9519                                           |       | 8136   | 10903  |                            |        | 2012-2016    | GER     | Weighted mean                                                                            |
| <500gr                                   | 475                                            |       | 396    | 554    |                            | [1–5]  | 2012-2016    | GER     | yearly cases                                                                             |
| 500-749gr                                | 1540                                           |       | 1227   | 1854   |                            | [1–5]  | 2012-2016    | GER     | yearly cases                                                                             |
| 750-999gr                                | 2004                                           |       | 1741   | 2267   |                            | [1–5]  | 2012-2016    | GER     | yearly cases                                                                             |
| 1000-1249gr                              | 2166                                           |       | 1868   | 2464   |                            | [1–5]  | 2012-2016    | GER     | yearly cases                                                                             |
| 1250-1499gr                              | 3335                                           |       | 2905   | 3765   |                            | [1–5]  | 2012-2016    | GER     | yearly cases                                                                             |
| <b>- Probability NEC</b>                 | 5.70%                                          | 0.18% | 4.94%  | 6.54%  | Dirichlet(gamma(1;542.8))  |        | 1998-2001    | USA     | Weighted mean                                                                            |
| <500gr                                   | 7.19%                                          | 0.47% | 6.29%  | 8.18%  | Dirichlet(gamma(1;34.15))  | [6]    | 1998-2001    | USA     | adjusted by RR for P(NEC Sepsis)                                                         |
| 500-749gr                                | 8.67%                                          | 0.51% | 7.69%  | 9.74%  | Dirichlet(gamma(1;133.54)) | [6]    | 1998-2001    | USA     |                                                                                          |
| 750-999gr                                | 6.86%                                          | 0.43% | 6.03%  | 7.77%  | Dirichlet(gamma(1;137.49)) | [6]    | 1998-2001    | USA     |                                                                                          |
| 1000-1249gr                              | 5.48%                                          | 0.41% | 4.71%  | 6.34%  | Dirichlet(gamma(1;118.75)) | [6]    | 1998-2001    | USA     |                                                                                          |
| 1250-1499gr                              | 3.56%                                          | 0.31% | 2.98%  | 4.23%  | Dirichlet(gamma(1;118.86)) | [6]    | 1998-2001    | USA     |                                                                                          |
| <b>-- Probability NEC surgical</b>       | 29.03%                                         | 0.87% | 21.81% | 28.72% | beta(787.71;1925.29)       |        | 2012-2016    | GER     | Weighted mean                                                                            |
| <500gr                                   | 52.71%                                         | 3.82% | 44.93% | 60.38% | beta(89.47;80.29)          | [9]    | 2012-2016    | GER     |                                                                                          |
| 500-749gr                                | 43.79%                                         | 1.92% | 39.98% | 47.65% | beta(291.93;374.78)        | [9]    | 2012-2016    | GER     |                                                                                          |
| 750-999gr                                | 30.35%                                         | 1.75% | 26.93% | 33.94% | beta(208.32;478.15)        | [9]    | 2012-2016    | GER     | Redistributed across birth weights according to Jeschke 2016                             |
| 1000-1249gr                              | 21.01%                                         | 1.67% | 17.80% | 24.51% | beta(124.56;468.19)        | [9]    | 2012-2016    | GER     |                                                                                          |
| 1250-1499gr                              | 12.15%                                         | 1.34% | 9.64%  | 15.06% | beta(72.11;521.19)         | [9]    | 2012-2016    | GER     |                                                                                          |
| <b>--- Death background</b>              | Same as mortality of VLBW with No Complication |       |        |        |                            |        |              |         |                                                                                          |
| <b>--- Death due to NEC surgical</b>     | 14.65%                                         | 1.07% | 6.08%  | 15.68% | beta(159.85;931.15)        |        | 2000-2011    | GER     | Weighted mean                                                                            |
| <500gr                                   | 19.53%                                         | 4.27% | 6.71%  | 32.35% | beta(16.6;68.4)            | [10]   | 2000-2011    | GER     |                                                                                          |
| 500-749gr                                | 18.39%                                         | 2.03% | 13.01% | 23.78% | beta(67.14;297.86)         | [10]   | 2000-2011    | GER     |                                                                                          |
| 750-999gr                                | 14.94%                                         | 1.97% | 10.78% | 19.10% | beta(48.85;278.15)         | [10]   | 2000-2011    | GER     |                                                                                          |
| 1000-1249gr                              | 7.34%                                          | 1.96% | 3.50%  | 11.19% | beta(12.93;163.07)         | [10]   | 2000-2011    | GER     |                                                                                          |
| 1250-1499gr                              | 6.03%                                          | 2.05% | 1.64%  | 10.42% | beta(8.08;125.92)          | [10]   | 2000-2011    | GER     |                                                                                          |
| <b>---- Probability BPD NEC surgical</b> | 7.24%                                          | 0.27% | 6.73%  | 7.78%  | beta(689.33;8829.07)       | [1–5]  | 2012-2016    | GER     | Average yearly cases between 2012 and 2016; Only cases with gestational age of >24 weeks |
| <500gr                                   | 52.08%                                         | 7.21% | 37.19% | 66.71% | beta(24.48;22.52)          | [12]   | 2013-2014    | KOR     | Moderate and severe BPD                                                                  |

|                                                      |                                                                                                                                                                           |            |            |            |                        |        |                   |     |                                                                                                      |
|------------------------------------------------------|---------------------------------------------------------------------------------------------------------------------------------------------------------------------------|------------|------------|------------|------------------------|--------|-------------------|-----|------------------------------------------------------------------------------------------------------|
| 500-749gr                                            | 48.06%                                                                                                                                                                    | 2.84%      | 42.38%     | 53.78%     | beta(148.52;160.48)    | [12]   | 2013-2014         | KOR |                                                                                                      |
| 750-999gr                                            | 40.84%                                                                                                                                                                    | 2.15%      | 36.60%     | 45.19%     | beta(213.59;309.41)    | [12]   | 2013-2014         | KOR |                                                                                                      |
| 1000-1249gr                                          | 30.24%                                                                                                                                                                    | 1.96%      | 26.42%     | 34.27%     | beta(165.7;382.3)      | [12]   | 2013-2014         | KOR |                                                                                                      |
| 1250-1499gr                                          | 18.25%                                                                                                                                                                    | 1.63%      | 15.13%     | 21.70%     | beta(101.82;456.18)    | [12]   | 2013-2014         | KOR |                                                                                                      |
| <b>---- Probability SBS NEC surgical</b>             | 19.39%                                                                                                                                                                    | 1.85%      | 15.87%     | 23.31%     | beta(88.81;369.19)     | [13]   | 2002-2005         | USA |                                                                                                      |
| <500gr                                               | 18.60%                                                                                                                                                                    | 2.15%      | 15.87%     | 23.31%     | beta(60.81;266.19)     | calc   | 2002-2005         | USA | Cole 2008 found no significant difference in risk for SBS and birth weight when controlling for NEC. |
| 500-749gr                                            | 18.60%                                                                                                                                                                    | 2.15%      | 15.87%     | 23.31%     | beta(60.81;266.19)     | calc   | 2002-2005         | USA |                                                                                                      |
| 750-999gr                                            | 18.60%                                                                                                                                                                    | 2.15%      | 15.87%     | 23.31%     | beta(60.81;266.19)     | calc   | 2002-2005         | USA |                                                                                                      |
| 1000-1249gr                                          | 21.37%                                                                                                                                                                    | 3.58%      | 15.87%     | 23.31%     | beta(27.79;102.21)     | calc   | 2002-2005         | USA |                                                                                                      |
| 1250-1499gr                                          | 21.37%                                                                                                                                                                    | 3.58%      | 15.87%     | 23.31%     | beta(27.79;102.21)     | calc   | 2002-2005         | USA |                                                                                                      |
| <b>---- Probability RoP NEC surgical</b>             | 8.97%                                                                                                                                                                     | 0.25%      | 7.42%      | 10.83%     | beta(1178.93;11967.07) |        | 2008-2012         | GER | Weighted mean                                                                                        |
| <500gr                                               | 26.74%                                                                                                                                                                    | 1.71%      | 20.61%     | 33.97%     | beta(179.66;492.34)    | [11]   | 2008-2012         | GER | adjusted by RR for P(RoP NEC)                                                                        |
| 500-749gr                                            | 31.71%                                                                                                                                                                    | 1.00%      | 27.90%     | 35.84%     | beta(680.42;1465.58)   | [11]   | 2008-2012         | GER |                                                                                                      |
| 750-999gr                                            | 9.55%                                                                                                                                                                     | 0.56%      | 7.68%      | 11.72%     | beta(263.8;2499.2)     | [11]   | 2008-2012         | GER |                                                                                                      |
| 1000-1249gr                                          | 1.76%                                                                                                                                                                     | 0.24%      | 1.05%      | 2.78%      | beta(53.96;3006.04)    | [11]   | 2008-2012         | GER |                                                                                                      |
| 1250-1499gr                                          | 0.27%                                                                                                                                                                     | 0.08%      | 0.07%      | 0.68%      | beta(11.99;4489.01)    | [11]   | 2008-2012         | GER |                                                                                                      |
| <b>---- Probability CP NEC surgical</b>              | 23.84%                                                                                                                                                                    | 3.25%      | 17.68%     | 30.92%     | beta(40.76;130.24)     | [7, 8] | >1974 & 2002-2004 | USA | No weight stratification; Sonntag 2007 ignored due to low case numbers                               |
| <b>---- Probability Neuro NEC surgical</b>           | 0.39285714                                                                                                                                                                | 0.09229619 | 0.21504283 | 0.59423179 | beta(10.61;16.39)      | [7]    | 2002-2004         | USA | No weight stratification                                                                             |
| <b>---- Probability No complication NEC surgical</b> | Complementary probability other complications/morbidities assuming independence, i.e. $1 - P(\text{BPD}) * P(\text{RoP}) * P(\text{SBS}) * P(\text{CP}) * P(\text{NI})$ . |            |            |            |                        |        |                   |     |                                                                                                      |
| <b>-- Probability NEC medical</b>                    | Complementary probability to the Probability of NEC surgical                                                                                                              |            |            |            |                        |        |                   |     |                                                                                                      |
| <b>--- Death background</b>                          | Same as mortality of VLBW with No Complication                                                                                                                            |            |            |            |                        |        |                   |     |                                                                                                      |
| <b>--- Death due to NEC medical</b>                  | Same as mortality for NEC surgical                                                                                                                                        |            |            |            |                        |        |                   |     |                                                                                                      |
| <b>---- Probability BPD NEC medical</b>              | Same as BPD probability for NEC surgical                                                                                                                                  |            |            |            |                        |        |                   |     |                                                                                                      |
| <b>---- Probability RoP NEC medical</b>              | Same as ROP probability for NEC surgical                                                                                                                                  |            |            |            |                        |        |                   |     |                                                                                                      |
| <b>---- Probability CP NEC medical</b>               | 11.64%                                                                                                                                                                    | 2.33%      | 7.44%      | 17.09%     | beta(21.88;166.12)     | [7, 8] | >1974 & 2002-2004 | USA | No weight stratification; Sonntag 2007 ignored due to low case numbers                               |
| <b>---- Probability Neuro NEC medical</b>            | 23.08%                                                                                                                                                                    | 6.75%      | 11.13%     | 39.33%     | beta(8.77;29.23)       | [7]    | 2002-2004         | USA | No weight stratification                                                                             |
| <b>---- Probability No complication NEC medical</b>  | Complementary probability other complications/morbidities assuming independence, i.e. $1 - P(\text{BPD}) * P(\text{RoP}) * P(\text{CP}) * P(\text{NI})$ .                 |            |            |            |                        |        |                   |     |                                                                                                      |

|                                                  |                                                                                                                                                           |       |        |        |                             |        |                   |     |                                                                        |
|--------------------------------------------------|-----------------------------------------------------------------------------------------------------------------------------------------------------------|-------|--------|--------|-----------------------------|--------|-------------------|-----|------------------------------------------------------------------------|
| <b>- Probability Sepsis</b>                      | 12.67%                                                                                                                                                    | 0.12% | 12.14% | 13.21% | Dirichlet(gamma(1;1206.05)) | calc   | 2012-2016         | GER | Weighted mean                                                          |
| <i>&lt;500gr</i>                                 | 36.23%                                                                                                                                                    | 1.18% | 33.91% | 38.59% | Dirichlet(gamma(1;172))     | [9]    | 2012-2016         | GER | adjusted by RR for P(NEC Sepsis)                                       |
| <i>500-749gr</i>                                 | 19.74%                                                                                                                                                    | 0.33% | 19.11% | 20.39% | Dirichlet(gamma(1;304.09))  | [9]    | 2012-2016         | GER |                                                                        |
| <i>750-999gr</i>                                 | 20.06%                                                                                                                                                    | 0.33% | 19.42% | 20.71% | Dirichlet(gamma(1;401.96))  | [9]    | 2012-2016         | GER |                                                                        |
| <i>1000-1249gr</i>                               | 5.91%                                                                                                                                                     | 0.15% | 5.61%  | 6.22%  | Dirichlet(gamma(1;128.02))  | [9]    | 2012-2016         | GER |                                                                        |
| <i>1250-1499gr</i>                               | 6.00%                                                                                                                                                     | 0.16% | 5.70%  | 6.31%  | Dirichlet(gamma(1;199.98))  | [9]    | 2012-2016         | GER |                                                                        |
| <b>Death background</b>                          | General Mortality of VLBW without major morbidity                                                                                                         |       |        |        |                             |        |                   |     |                                                                        |
| <b>Death Sepsis</b>                              | 17.46%                                                                                                                                                    | 2.76% | 12.33% | 23.64% | beta(32.83;155.17)          | [14]   | 2010              | GER |                                                                        |
| <b>---- Probability BPD   Sepsis</b>             | Same BPD probability as for NEC surgical                                                                                                                  |       |        |        |                             |        |                   |     |                                                                        |
| <b>---- Probability RoP   Sepsis</b>             | 2.80%                                                                                                                                                     | 0.14% | 2.32%  | 3.38%  | beta(368.02;12777.98)       |        | 2008-2012         | GER | Weighted mean                                                          |
| <i>&lt;500gr</i>                                 | 8.35%                                                                                                                                                     | 1.07% | 6.43%  | 10.60% | beta(56.09;615.91)          | [11]   | 2008-2012         | GER | adjusted by RR for P(RoP INEC)                                         |
| <i>500-749gr</i>                                 | 9.90%                                                                                                                                                     | 0.64% | 8.71%  | 11.19% | beta(212.41;1933.59)        | [11]   | 2008-2012         | GER |                                                                        |
| <i>750-999gr</i>                                 | 2.98%                                                                                                                                                     | 0.32% | 2.40%  | 3.66%  | beta(82.35;2680.65)         | [11]   | 2008-2012         | GER |                                                                        |
| <i>1000-1249gr</i>                               | 0.55%                                                                                                                                                     | 0.13% | 0.33%  | 0.87%  | beta(16.85;3043.15)         | [11]   | 2008-2012         | GER |                                                                        |
| <i>1250-1499gr</i>                               | 0.08%                                                                                                                                                     | 0.04% | 0.02%  | 0.21%  | beta(3.74;4497.26)          | [11]   | 2008-2012         | GER |                                                                        |
| <b>---- Probability CP   Sepsis</b>              | 19.53%                                                                                                                                                    | 2.44% | 6.71%  | 32.35% | beta(51.56;212.44)          | [7, 8] | >1974 & 2002-2004 | USA | No weight stratification; Sonntag 2007 ignored due to low case numbers |
| <b>---- Probability Neuro   Sepsis</b>           | 35.92%                                                                                                                                                    | 3.07% | 29.91% | 42.27% | beta(87.64;156.36)          | [7]    | 2002-2004         | USA | No weight stratification                                               |
| <b>---- Probability No complication   Sepsis</b> | Complementary probability other complications/morbidities assuming independence, i.e. $1 - P(\text{BPD}) * P(\text{RoP}) * P(\text{CP}) * P(\text{NI})$ . |       |        |        |                             |        |                   |     |                                                                        |
| <b>- Probabilitiy NEC + Sepsis</b>               | 2.28%                                                                                                                                                     | 0.12% | 1.83%  | 2.82%  | Dirichlet(gamma(1;217.16))  |        |                   |     | Weighted mean                                                          |
| <i>&lt;500gr</i>                                 | 7.12%                                                                                                                                                     | 0.63% | 5.93%  | 8.47%  | Dirichlet(gamma(1;33.83))   |        |                   |     | adjusted by RR for P(NEC Sepsis)                                       |
| <i>500-749gr</i>                                 | 4.68%                                                                                                                                                     | 0.39% | 3.95%  | 5.50%  | Dirichlet(gamma(1;72.09))   |        |                   |     |                                                                        |
| <i>750-999gr</i>                                 | 3.70%                                                                                                                                                     | 0.32% | 3.09%  | 4.40%  | Dirichlet(gamma(1;74.22))   |        |                   |     |                                                                        |
| <i>1000-1249gr</i>                               | 0.85%                                                                                                                                                     | 0.17% | 0.56%  | 1.25%  | Dirichlet(gamma(1;18.5))    |        |                   |     |                                                                        |
| <i>1250-1499gr</i>                               | 0.56%                                                                                                                                                     | 0.13% | 0.34%  | 0.86%  | Dirichlet(gamma(1;18.52))   |        |                   |     |                                                                        |
| <b>NEC surgical + Sepsis</b>                     | Same as proportion for NEC surgical without sepsis                                                                                                        |       |        |        |                             |        |                   |     |                                                                        |
| <b>Death background</b>                          | General Mortality of VLBW without major morbidity                                                                                                         |       |        |        |                             |        |                   |     |                                                                        |
| <b>Death due to NEC</b>                          | Mortality of NEC surgical combined with mortality of Sepsis                                                                                               |       |        |        |                             |        |                   |     |                                                                        |
| <b>BPD</b>                                       | Probability of BPD NEC combined with probability BPD Sepsis                                                                                               |       |        |        |                             |        |                   |     |                                                                        |
| <b>SBS</b>                                       | Same as probability for SBS for NEC without sepsis                                                                                                        |       |        |        |                             |        |                   |     |                                                                        |
| <b>RoP</b>                                       | Probability of RoP NEC combined with probability RoP Sepsis                                                                                               |       |        |        |                             |        |                   |     |                                                                        |

|                             |                                                                                                                                                           |        |        |        |                             |      |           |     |                                                                                  |
|-----------------------------|-----------------------------------------------------------------------------------------------------------------------------------------------------------|--------|--------|--------|-----------------------------|------|-----------|-----|----------------------------------------------------------------------------------|
| <b>CP</b>                   | 21.43%                                                                                                                                                    | 10.97% | 4.66%  | 50.80% | beta(2.79;10.21)            | [7]  | 2002-2004 | USA |                                                                                  |
| <b>Neuro</b>                | 50.00%                                                                                                                                                    | 13.36% | 23.04% | 76.96% | beta(6.5;6.5)               | [7]  | 2002-2004 | USA |                                                                                  |
| <b>No complication</b>      | Complementary probability other complications/morbidities assuming independence.                                                                          |        |        |        |                             |      |           |     |                                                                                  |
| <b>NEC medical + Sepsis</b> | Same as proportion for NEC medical without sepsis                                                                                                         |        |        |        |                             |      |           |     |                                                                                  |
| <b>Death background</b>     | General Mortality of VLBW without major morbidity                                                                                                         |        |        |        |                             |      |           |     |                                                                                  |
| <b>Death due to NEC</b>     | Mortality of NEC without NEC combined with mortality of Sepsis                                                                                            |        |        |        |                             |      |           |     |                                                                                  |
| <b>BPD</b>                  | BPD of NEC combined with BPD of Sepsis                                                                                                                    |        |        |        |                             |      |           |     |                                                                                  |
| <b>RoP</b>                  | RoP of NEC combined with RoP of Sepsis                                                                                                                    |        |        |        |                             |      |           |     |                                                                                  |
| <b>CP</b>                   | 20.00%                                                                                                                                                    | 8.94%  | 5.73%  | 43.66% | beta(3.8;15.2)              | [7]  | 2002-2004 | USA |                                                                                  |
| <b>Neuro</b>                | 45.00%                                                                                                                                                    | 11.12% | 23.06% | 68.47% | beta(8.55;10.45)            | [7]  | 2002-2004 | USA |                                                                                  |
| <b>No complication</b>      | Complementary probability other complications/morbidities assuming independence, i.e. $1 - P(\text{BPD}) * P(\text{RoP}) * P(\text{CP}) * P(\text{NI})$ . |        |        |        |                             |      |           |     |                                                                                  |
| <b>No NEC or sepsis</b>     | 79.35%                                                                                                                                                    |        | 81.08% | 77.43% | Dirichlet(gamma(1;7553.39)) |      |           |     | complementary probability other complications/morbidities; assuming independence |
| <i>&lt;500gr</i>            | 49.46%                                                                                                                                                    |        | 53.86% | 44.77% | Dirichlet(gamma(1;234.82))  |      |           |     |                                                                                  |
| <i>500-749gr</i>            | 66.91%                                                                                                                                                    |        | 69.25% | 64.38% | Dirichlet(gamma(1;1030.48)) |      |           |     |                                                                                  |
| <i>750-999gr</i>            | 69.38%                                                                                                                                                    |        | 71.46% | 67.13% | Dirichlet(gamma(1;1390.32)) |      |           |     |                                                                                  |
| <i>1000-1249gr</i>          | 87.75%                                                                                                                                                    |        | 89.12% | 86.19% | Dirichlet(gamma(1;1900.33)) |      |           |     |                                                                                  |
| <i>1250-1499gr</i>          | 89.88%                                                                                                                                                    |        | 90.99% | 88.60% | Dirichlet(gamma(1;2997.44)) |      |           |     |                                                                                  |
| <b>Death background</b>     | 12.73%                                                                                                                                                    | 0.41%  | 11.65% | 13.91% | beta(838.92;5752.05)        |      |           |     |                                                                                  |
| <i>&lt;500gr</i>            | 56.70%                                                                                                                                                    | 4.91%  | 51.90% | 61.60% | beta(57.08;43.59)           | [11] | 2008-2012 | GER | 180 day survival without major morbidity                                         |
| <i>500-749gr</i>            | 37.80%                                                                                                                                                    | 1.92%  | 35.70% | 40.00% | beta(241.9;398.06)          | [11] | 2008-2012 | GER | 180 day survival without major morbidity                                         |
| <i>750-999gr</i>            | 16.40%                                                                                                                                                    | 1.09%  | 15.10% | 17.90% | beta(190.45;970.86)         | [11] | 2008-2012 | GER | 180 day survival without major morbidity                                         |
| <i>1000-1249gr</i>          | 6.20%                                                                                                                                                     | 0.57%  | 5.40%  | 7.20%  | beta(110.45;1671.05)        | [11] | 2008-2012 | GER | 180 day survival without major morbidity                                         |
| <i>1250-1499gr</i>          | 3.10%                                                                                                                                                     | 0.32%  | 2.60%  | 3.60%  | beta(90.01;2813.51)         | [11] | 2008-2012 | GER | 180 day survival without major morbidity                                         |
| <b>BPD</b>                  | Same BPD probability as for NEC surgical                                                                                                                  |        |        |        |                             |      |           |     |                                                                                  |
| <b>RoP</b>                  | 2.80%                                                                                                                                                     | 0.14%  | 2.32%  | 3.38%  | beta(368.02;12777.98)       |      | 2008-2012 | GER | Weighted mean                                                                    |
| <i>&lt;500gr</i>            | 8.35%                                                                                                                                                     | 1.07%  | 6.43%  | 10.60% | beta(56.09;615.91)          | [11] | 2008-2012 | GER | adjusted by RR for P(RoP INEC)                                                   |
| <i>500-749gr</i>            | 9.90%                                                                                                                                                     | 0.64%  | 8.71%  | 11.19% | beta(212.41;1933.59)        | [11] | 2008-2012 | GER |                                                                                  |
| <i>750-999gr</i>            | 2.98%                                                                                                                                                     | 0.32%  | 2.40%  | 3.66%  | beta(82.35;2680.65)         | [11] | 2008-2012 | GER |                                                                                  |
| <i>1000-1249gr</i>          | 0.55%                                                                                                                                                     | 0.13%  | 0.33%  | 0.87%  | beta(16.85;3043.15)         | [11] | 2008-2012 | GER |                                                                                  |
| <i>1250-1499gr</i>          | 0.08%                                                                                                                                                     | 0.04%  | 0.02%  | 0.21%  | beta(3.74;4497.26)          | [11] | 2008-2012 | GER |                                                                                  |
| <b>CP</b>                   | 14.96%                                                                                                                                                    | 1.25%  | 12.57% | 17.60% | beta(120.85;687.15)         | [7]  | 2002-2004 | USA |                                                                                  |
| <b>Neuro</b>                | 22.00%                                                                                                                                                    | 1.46%  | 19.19% | 25.02% | beta(177.78;630.22)         | [7]  | 2002-2004 | USA |                                                                                  |

| No complication   | Complementary probability other complications/morbidities assuming independence, i.e. $1 - P(\text{BPD}) * P(\text{RoP}) * P(\text{CP}) * P(\text{NI})$ . |       |       |       |                        |          |           |                                |
|-------------------|-----------------------------------------------------------------------------------------------------------------------------------------------------------|-------|-------|-------|------------------------|----------|-----------|--------------------------------|
| RR (NEC total)    | 0.400                                                                                                                                                     | 0.141 | 0.528 | 0.357 | lognormal(-0.992;0.14) | [15, 16] | 2008/2010 | USA                            |
| RR (NEC surgical) | 0.452                                                                                                                                                     | 0.468 | 1.131 | 0.152 | lognormal(-0.79;0.47)  | [15, 16] | 2008/2010 | USA                            |
| RR (Sepsis)       | 0.680                                                                                                                                                     | 0.080 | 0.795 | 0.664 | lognormal(-0.39;0.08)  | [15, 16] | 2008/2010 | USA                            |
| RR (Sepsis + NEC) | 0.272                                                                                                                                                     | 0.011 | 0.420 | 0.274 | lognormal(-1.30;0.01)  |          |           | Combined                       |
| RR (mortality)    | 0.716                                                                                                                                                     | 0.117 | 0.902 | 0.790 | lognormal(-0.33;0.12)  | [15, 16] | 2008/2010 | USA                            |
| RR (BPD)          | 0.849                                                                                                                                                     | 0.048 | 0.933 | 0.846 | lognormal(-0.16;0.05)  | [16]     |           | USA                            |
| RR (RoP)          | 0.551                                                                                                                                                     | 0.184 | 0.789 | 0.515 | lognormal(-0.60;0.18)  | [16, 17] |           | USA                            |
| RR (CP)           | 0.90                                                                                                                                                      | -     | 1.00  | 1.00  | 1.00                   |          |           |                                |
| RR (Neurological) | 0.90                                                                                                                                                      | -     | 1.00  | 1.00  | 1.00                   |          |           | I assumed in scenario analyses |

## Part 2a: Economic input parameter values.

| Name                                | Mean     | SD | Low     | High     | Probabilistic value | Source                                     | Study period | Country | Comment                         |
|-------------------------------------|----------|----|---------|----------|---------------------|--------------------------------------------|--------------|---------|---------------------------------|
| <b>Costs EHDM</b>                   | 6,812 €  |    | 4,415 € | 7,569 €  | Not applicable      |                                            |              |         |                                 |
| <500gr                              | 13,015 € |    | 8,622 € | 14,221 € | Not applicable      |                                            |              |         |                                 |
| 500-749gr                           | 11,895 € |    | 7,863 € | 13,221 € | Not applicable      | Prolacta® Biosciences                      |              |         |                                 |
| 750-999gr                           | 9,106 €  |    | 5,973 € | 10,348 € | Not applicable      |                                            |              |         |                                 |
| 1000-1249gr                         | 5,208 €  |    | 3,359 € | 5,760 €  | Not applicable      |                                            |              |         |                                 |
| 1250-1499gr                         | 3,246 €  |    | 2,129 € | 3,317 €  | Not applicable      |                                            |              |         |                                 |
| <b>Donor milk (litres)</b>          | 3.71     |    | 2.93    | 3.28     | Not applicable      |                                            | [18]         |         |                                 |
| <500gr                              | 7.08     |    | 5.67    | 7.18     | Not applicable      | [18]                                       |              |         |                                 |
| 500-749gr                           | 6.49     |    | 5.19    | 5.95     | Not applicable      | [18]                                       |              |         | Only used in scenario analysis. |
| 750-999gr                           | 4.97     |    | 3.97    | 4.11     | Not applicable      | [18]                                       |              |         |                                 |
| 1000-1249gr                         | 2.81     |    | 2.25    | 1.65     | Not applicable      | [18]                                       |              |         |                                 |
| 1250-1499gr                         | 1.77     |    | 1.41    | 1.95     | Not applicable      | [18]                                       |              |         |                                 |
| <b>Price donor milk (per litre)</b> | 65.00 €  |    | 60.00 € | 90.00 €  | Not applicable      | Personal communication (Milk bank Leipzig) | 2018         | GER     |                                 |
| <b>Costs BOV</b>                    | 223 €    |    | 223     | 223      | Not applicable      |                                            |              |         |                                 |
| <500gr                              | 612 €    |    | 612     | 612      | Not applicable      |                                            |              |         |                                 |
| 500-749gr                           | 444 €    |    | 444     | 444      | Not applicable      |                                            |              |         | Only used in scenario analysis. |
| 750-999gr                           | 276 €    |    | 276     | 276      | Not applicable      |                                            |              |         |                                 |
| 1000-1249gr                         | 108 €    |    | 108     | 108      | Not applicable      |                                            |              |         |                                 |
| 1250-1499gr                         | 108 €    |    | 108     | 108      | Not applicable      |                                            |              |         |                                 |

## LOS Factor

|                                          |           |          |              |              |                        |      |           |     |                                                            |
|------------------------------------------|-----------|----------|--------------|--------------|------------------------|------|-----------|-----|------------------------------------------------------------|
| <500gr                                   | 1.49      | 0.04     | 1.43         | 1.58         | gamma(1151;0.0013)     | [9]  | 2002-2016 | GER |                                                            |
| 500-749gr                                | 1.34      | 0.01     | 1.32         | 1.35         | gamma(14960.29;0.0001) | [9]  | 2002-2016 | GER | Available for categories <500gr, 500-999gr and 1000-1499gr |
| 750-999gr                                |           |          |              |              |                        |      |           |     |                                                            |
| 1000-1249gr                              | 0.75      | 0.01     | 0.74         | 0.77         | gamma(7187.27;0.0001)  | [9]  | 2002-2016 | GER |                                                            |
| 1250-1499gr                              |           |          |              |              |                        |      |           |     |                                                            |
| <b>LOS NEC</b>                           | 31.25     | 46.96    | 31.20        | 31.30        | gamma(0.44;70.57)      | [19] | 2006-2016 | GER |                                                            |
| <b>LOS NEC mortality</b>                 | 20.81     | 47.00    | 20.22        | 21.40        | gamma(0.2;106.18)      | [19] | 2006-2016 | GER |                                                            |
| <b>LOS Sepsis</b>                        | 8.39      | 6.89     | 8.38         | 8.39         | gamma(1.48;5.66)       | [19] | 2006-2016 | GER |                                                            |
| <b>LOS Sepsis mortality</b>              | 5.26      | 13.30    | 5.10         | 5.42         | gamma(0.16;33.68)      | [19] | 2006-2016 | GER |                                                            |
| <b>LOS NEC + Sepsis</b>                  | 31.25     | 46.96    | 31.20        | 31.30        | gamma(0.44;70.57)      | [19] | 2006-2016 | GER |                                                            |
| <b>LOS NEC + Sepsis mortality</b>        | 13.03     |          |              |              |                        | [19] |           |     | Weighted average of NEC and sepsis.                        |
| <b>LOS no complication</b>               |           |          |              |              |                        |      |           |     |                                                            |
| <500gr                                   |           |          |              |              |                        |      |           |     |                                                            |
| 500-749gr                                | 74.15     | 61.29    | 74.15        | 74.15        | gamma(1.46;50.67)      | [19] | 2006-2016 | GER |                                                            |
| 750-999gr                                |           |          |              |              |                        |      |           |     |                                                            |
| 1000-1249gr                              | 20.49     | 21.56    | 20.49        | 20.49        | gamma(0.90;22.68)      | [19] | 2006-2016 | GER |                                                            |
| 1250-1499gr                              |           |          |              |              |                        |      |           |     |                                                            |
| <b>LOS no complication mortality</b>     | 11.67     | 32.48    | 11.66        | 11.68        | gamma(0.13;90.37)      |      | 2006-2016 | GER |                                                            |
| <b>LOS RoP</b>                           | 12.64     | 24.01    | 12.61        | 12.67        | gamma(0.28;45.60)      | [19] | 2006-2016 | GER |                                                            |
| <b>LOS SBS</b>                           | 29.13     | 34.84    | 29.00        | 29.26        | gamma(0.70;41.67)      | [19] | 2006-2016 | GER |                                                            |
| <b>LOS BPD</b>                           | 25.57     | 34.19    | 25.53        | 25.60        | gamma(0.56;45.73)      | [19] | 2006-2016 | GER |                                                            |
| <b>Basecase</b>                          | 3,376 €   | 18 €     | 3,342 €      | 3,461 €      | gamma(36916.37;0.09)   | [20] | 2017      | GER |                                                            |
| <b>Direct Costs Cerebral Palsy</b>       | 232,703 € | 79,504 € | 76,874 €     | 471,616 €    | gamma(8.57;27163.25)   | [21] | 2017      | GER |                                                            |
| <b>Direct Costs Neurological</b>         | 94,220 €  | 8,316 €  | 77,920 €     | 112,403 €    | gamma(128.37;733.99)   | [21] | 2017      | GER |                                                            |
| <b>Life-time earnings</b>                | 396,543 € | 39,654 € | 318,820.25 € | 474,264.95 € | gamma(100;3965.43)     | [22] | 2017      | GER |                                                            |
| <b>Reduced productivity CP</b>           | 48.1%     |          | 63.9%        | 42.6%        | beta(12.98;13.48)      | [23] | -         | GER |                                                            |
| <b>Reduced productivity Neurological</b> | 60.2%     |          | 77.8%        | 27.9%        | beta(9.95;6.18)        | [23] | -         | GER |                                                            |
| <b>Friction period</b>                   | 92        | 14.29    | 64           | 98           | gamma(41.47;2.22)      | [24] | 2015      | GER |                                                            |

## Part 2b: Diagnosis related groups (DRGs) used for cost calculations

| Health state | Birth weight | DRG | Cost weight | Mean LOS | 1 <sup>st</sup> day | 1 <sup>st</sup> day | Deduction | Surcharge |
|--------------|--------------|-----|-------------|----------|---------------------|---------------------|-----------|-----------|
|--------------|--------------|-----|-------------|----------|---------------------|---------------------|-----------|-----------|

|                 |             |                        |       |        | deduction | surcharge |      |      |
|-----------------|-------------|------------------------|-------|--------|-----------|-----------|------|------|
| No Complication | <500gr      | P61B                   | 36.02 | 104.40 | 34        | 122       | 1.02 | 0.34 |
|                 | 500-749gr   | P61D                   | 30.07 | 88.90  | 29        | 107       | 1.00 | 0.34 |
|                 | 750-999gr   | P62B, P62C             | 23.28 | 71.42  | 22        | 89        | 0.97 | 0.32 |
|                 | 1000-1249gr | P63Z                   | 9.30  | 42.00  | 13        | 60        | 0.66 | 0.21 |
|                 | 1250-1499gr | P64Z                   | 6.91  | 32.70  | 10        | 51        | 0.62 | 0.21 |
| NEC or Sepsis   | <500gr      | P61A                   | 47.51 | 102.70 | 33        | 121       | 1.35 | 0.45 |
|                 | 500-749gr   | P61C                   | 46.40 | 114.50 | 37        | 132       | 1.18 | 0.43 |
|                 | 750-999gr   | P62A                   | 30.58 | 80.70  | 26        | 99        | 1.10 | 0.37 |
|                 | 1000-1249gr | P03C                   | 12.03 | 47.40  | 15        | 65        | 0.00 | 0.00 |
|                 | 1250-1499gr | P03C                   | 12.03 | 47.40  | 15        | 65        | 0.00 | 0.00 |
| NEC + Sepsis    | <500gr      | P61A                   | 47.51 | 102.70 | 33        | 121       | 1.35 | 0.45 |
|                 | 500-749gr   | P61C                   | 46.40 | 114.50 | 37        | 132       | 1.18 | 0.43 |
|                 | 750-999gr   | P62A                   | 30.58 | 80.70  | 26        | 99        | 1.10 | 0.37 |
|                 | 1000-1249gr | P03A, P03B             | 16.49 | 54.91  | 16        | 72        | 0.90 | 0.29 |
|                 | 1250-1499gr | P03A, P03B             | 16.49 | 54.91  | 16        | 72        | 0.90 | 0.29 |
| Mortality       | <500gr      | P61E                   | 6.19  | 11.50  | 0         | 24        | 0.00 | 0.53 |
|                 | 500-749gr   | P61E                   | 6.19  | 11.50  | 0         | 24        | 0.00 | 0.53 |
|                 | 750-999gr   | P62D                   | 9.72  | 17.00  | 5         | 1000      | 1.58 | 0.00 |
|                 | 1000-1249gr | P60A                   | 0.72  | 1.40   | 0         | 1000      | 0.00 | 0.00 |
|                 | 1250-1499gr | P60A                   | 0.72  | 1.40   | 0         | 1000      | 0.00 | 0.00 |
| SBS             | overall     | G04Z, G50Z, G67A, G67B | 0.89  | 5.84   | 1.45      | 12.21     | 0.33 | 0.08 |
| RoP             | overall     | C63Z, C14Z             | 0.58  | 3.75   | 1         | 8.25      | 0.27 | 0.08 |
| BPD             | overall     | E69D                   | 0.48  | 3.00   | 1         | 6.00      | 0.24 | 0.11 |

## References

1. IQTIG. Bundesauswertung zum Erfassungsjahr 2016 - Neonatologie: Qualitätsindikatoren; 12.07.2017.
2. IQTIG. Bundesauswertung zum Erfassungsjahr 2015 - Neonatologie: Qualitätsindikatoren; 07.07.2016.
3. AQUA-Institut GmbH. Qualitätsreport 2014; 2015.
4. AQUA-Institut GmbH. Qualitätsreport 2013; 2014.
5. AQUA-Institut GmbH. Qualitätsreport 2012; 2013.

6. Guillet R, Stoll BJ, Cotten CM, Gantz M, McDonald S, Poole WK, Phelps DL. Association of H2-blocker therapy and higher incidence of necrotizing enterocolitis in very low birth weight infants. *Pediatrics*. 2006;117:e137-42. doi:10.1542/peds.2005-1543.
7. Martin CR, Dammann O, Allred EN, Patel S, O'Shea TM, Kuban KCK, Leviton A. Neurodevelopment of extremely preterm infants who had necrotizing enterocolitis with or without late bacteremia. *J Pediatr*. 2010;157:751-6.e1. doi:10.1016/j.jpeds.2010.05.042.
8. Rees CM, Pierro A, Eaton S. Neurodevelopmental outcomes of neonates with medically and surgically treated necrotizing enterocolitis. *Arch Dis Child Fetal Neonatal Ed*. 2007;92:F193-8. doi:10.1136/adc.2006.099929.
9. NRZ. KISS Krankenhaus-Infektions-Surveillance-System: Modul NEO-KISS Referenzdaten; 10.05.2017.
10. Schwab F, Zibell R, Piening B, Geffers C, Gastmeier P. Mortality due to bloodstream infections and necrotizing enterocolitis in very low birth weight infants. *Pediatr Infect Dis J*. 2015;34:235–40. doi:10.1097/INF.0000000000000532.
11. Jeschke E, Biermann A, Günster C, Böhler T, Heller G, Hummler HD, Bühner C. Mortality and Major Morbidity of Very-Low-Birth-Weight Infants in Germany 2008-2012: A Report Based on Administrative Data. *Front Pediatr*. 2016;4:23. doi:10.3389/fped.2016.00023.
12. Jo HS, Cho KH, Cho S-I, Song ES, Kim BI. Recent Changes in the Incidence of Bronchopulmonary Dysplasia among Very-Low-Birth-Weight Infants in Korea. *J Korean Med Sci*. 2015;30 Suppl 1:S81-7. doi:10.3346/jkms.2015.30.S1.S81.
13. Cole CR, Hansen NI, Higgins RD, Ziegler TR, Stoll BJ. Very low birth weight preterm infants with surgical short bowel syndrome: incidence, morbidity and mortality, and growth outcomes at 18 to 22 months. *Pediatrics*. 2008;122:e573-82. doi:10.1542/peds.2007-3449.
14. Stichtenoth G, Demmert M, Bohnhorst B, Stein A, Ehlers S, Heitmann F, et al. Major contributors to hospital mortality in very-low-birth-weight infants: data of the birth year 2010 cohort of the German Neonatal Network. *Klin Padiatr*. 2012;224:276–81. doi:10.1055/s-0032-1306344.
15. Abrams SA, Schanler RJ, Lee ML, Rechtman DJ. Greater mortality and morbidity in extremely preterm infants fed a diet containing cow milk protein products. *Breastfeed Med*. 2014;9:281–5. doi:10.1089/bfm.2014.0024.
16. Hair AB, Peluso AM, Hawthorne KM, Perez J, Smith DP, Khan JY, et al. Beyond Necrotizing Enterocolitis Prevention: Improving Outcomes with an Exclusive Human Milk-Based Diet. *Breastfeed Med*. 2016;11:70–4. doi:10.1089/bfm.2015.0134.
17. O'Connor DL, Kiss A, Tomlinson C, Bando N, Bayliss A, Campbell DM, et al. Nutrient enrichment of human milk with human and bovine milk-based fortifiers for infants born weighing <1250 g: a randomized clinical trial. *Am J Clin Nutr*. 2018;108:108–16. doi:10.1093/ajcn/nqy067.
18. Texas Children's Hospital. Feeding Protocol with Cream. 23rd ed.; 2017.
19. Statistisches Bundesamt. Krankenhausstatistik. 2017. [http://www.gbe-bund.de/oowa921-install/servlet/oowa/aw92/dboowasys921.xwdevkit/xwd\\_init?gbe.isgbetol/xs\\_start\\_neu/&p\\_aid=3&p\\_aid=88658613&nummer=702&p\\_sprache=D&p\\_indsp=-&p\\_aid=99250666#SOURCES](http://www.gbe-bund.de/oowa921-install/servlet/oowa/aw92/dboowasys921.xwdevkit/xwd_init?gbe.isgbetol/xs_start_neu/&p_aid=3&p_aid=88658613&nummer=702&p_sprache=D&p_indsp=-&p_aid=99250666#SOURCES).



20. GKV Spitzenverband. Bundesbasisfallwert (BBFW). 2018. <https://www.gkv-spitzenverband.de/krankenversicherung/krankenhaeuser/budgetverhandlungen/bundesbasisfallwert/bundesbasisfallwert.jsp>.
21. Scholz S, Meszaros K, Fassbender RM, Welte R, Greiner W, Koerber F. The Cost Of Illness For Invasive Meningococcal B Disease In Germany. *Value in Health*. 2017;20:A785. doi:10.1016/j.jval.2017.08.2290.
22. Statistisches Bundesamt. Wirtschaftsrechnungen 2015: Laufende Wirtschaftsrechnungen: Einkommen, Einnahmen und Ausgaben privater Haushalte. Wiesbaden; 17.01.2017.
23. Deutscher Bundestag. Verordnung zur Durchführung des § 1 Abs. 1 und 3, des § 30 Abs. 1 und des § 35 Abs. 1 des Bundesversorgungsgesetzes: Versorgungsmedizin-Verordnung - VersMedV; 10. Dezember 2008 (BGBl. I S. 2412).
24. Bundesagentur für Arbeit. Arbeitsmarkt 2015: Arbeitsmarktanalyse für Deutschland, West- und Ostdeutschland. Nürnberg; August 2016.
